# Supplementary material
Source: PubMed Central journal article supplement (PMC3663268)
Supplement: supp_tpc.113.110049_tpc110049Supplemental.pdf [file supp_tpc.113.110049_tpc110049Supplemental.pdf]

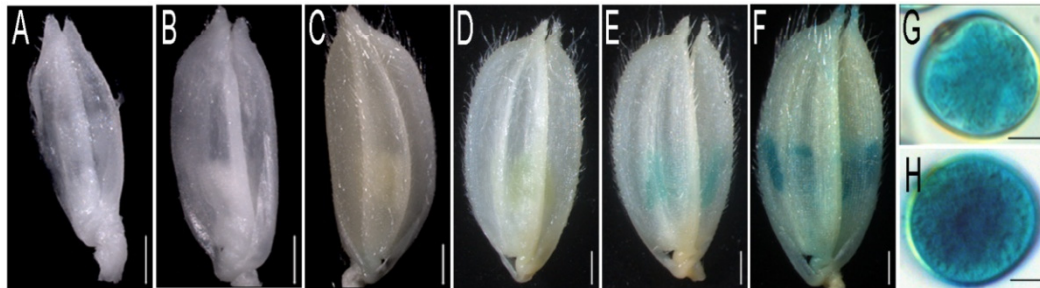

**Supplemental Figure 1. GUS staining analyses of florets and pollen grains in *MADS62<sub>pro</sub>:GUS* transgenic plants.**

A stained floret with anther before stage 8 (**A**), at stage 8 (**B**), at stage 9 (**C**), at stage 10 (**D**), at stage 11 (**E**) and a magnified pollen grain (**G**), at stage 12 (**F**) and a magnified pollen grain (**H**). Bars = 1 mm in (**A**) to (**F**), and 10  $\mu$ m in (**G**) and (**H**).

|        |        | S-clade |        | P-clade |        |
|--------|--------|---------|--------|---------|--------|
| prey   | bait   | MADS62  | MADS63 | MADS68  | pGBKT7 |
|        | MADS62 |         |        |         |        |
| MADS63 |        |         |        |         |        |
| MADS68 |        |         |        |         |        |
| pGADT7 |        |         |        |         |        |

**Supplemental Figure 2. Schematic depiction of rice MIKC\*-type fusion protein interactions as revealed by Y2H analyses.**

Each MIKC\*-type protein was fused to the activation domain (AD) as a prey and the DNA-binding domain (BD) as a bait. Color intensity corresponds to interaction strength and a darker color of the boxes represents stronger interactions. Empty vectors pGADT7 and pGBKT7 were used as a negative control.

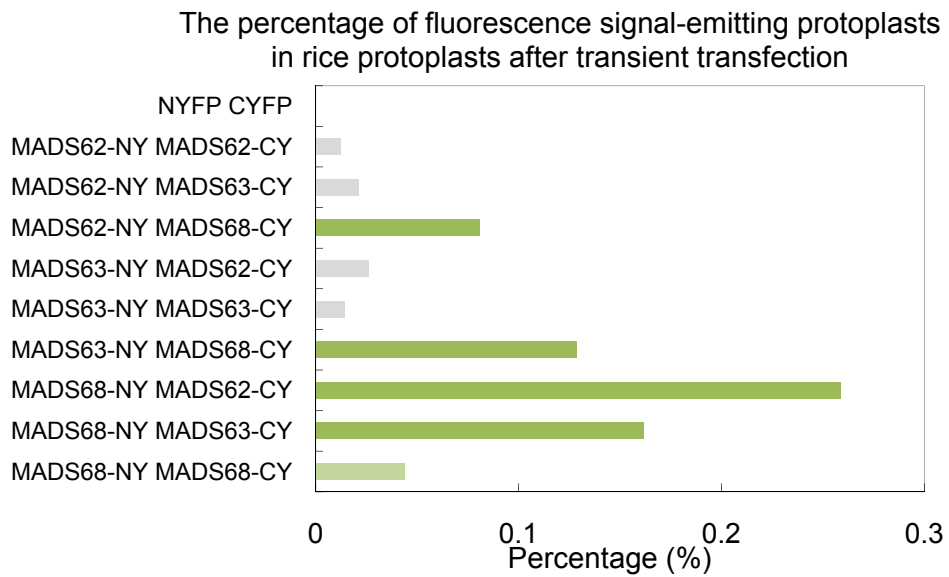

**Supplemental Figure 3. The percentage of BiFC fluorescence signal-emitting protoplasts in rice protoplasts after transient transfection.**

The mean of six independent experiments for each combination are shown. Empty NYFP and CYFP were used as negative control.

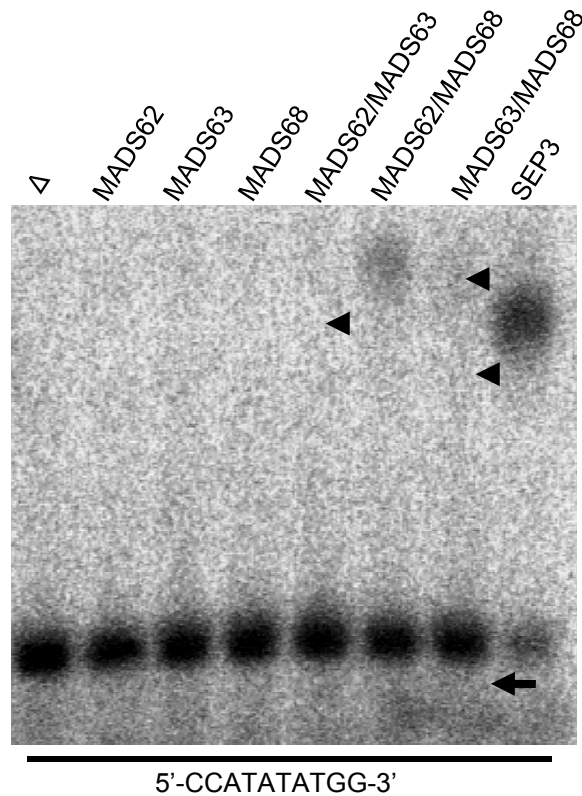

**Supplemental Figure 4. EMSA assay for rice MIKC\*-type heterodimeric complexes binding SRE-type CArG-box DNA.**

A probe containing a SRE-type CArG-box (5'-CCATATATTGG-3') was incubated with *in vitro* translated MADS62, MADS63, MADS68 and combinations of these proteins. Free DNA is indicated by an arrow, shifted complexes by arrowheads. *In vitro* translation with SEP3 and an empty vector ( $\Delta$ ) served as positive and negative control, respectively.

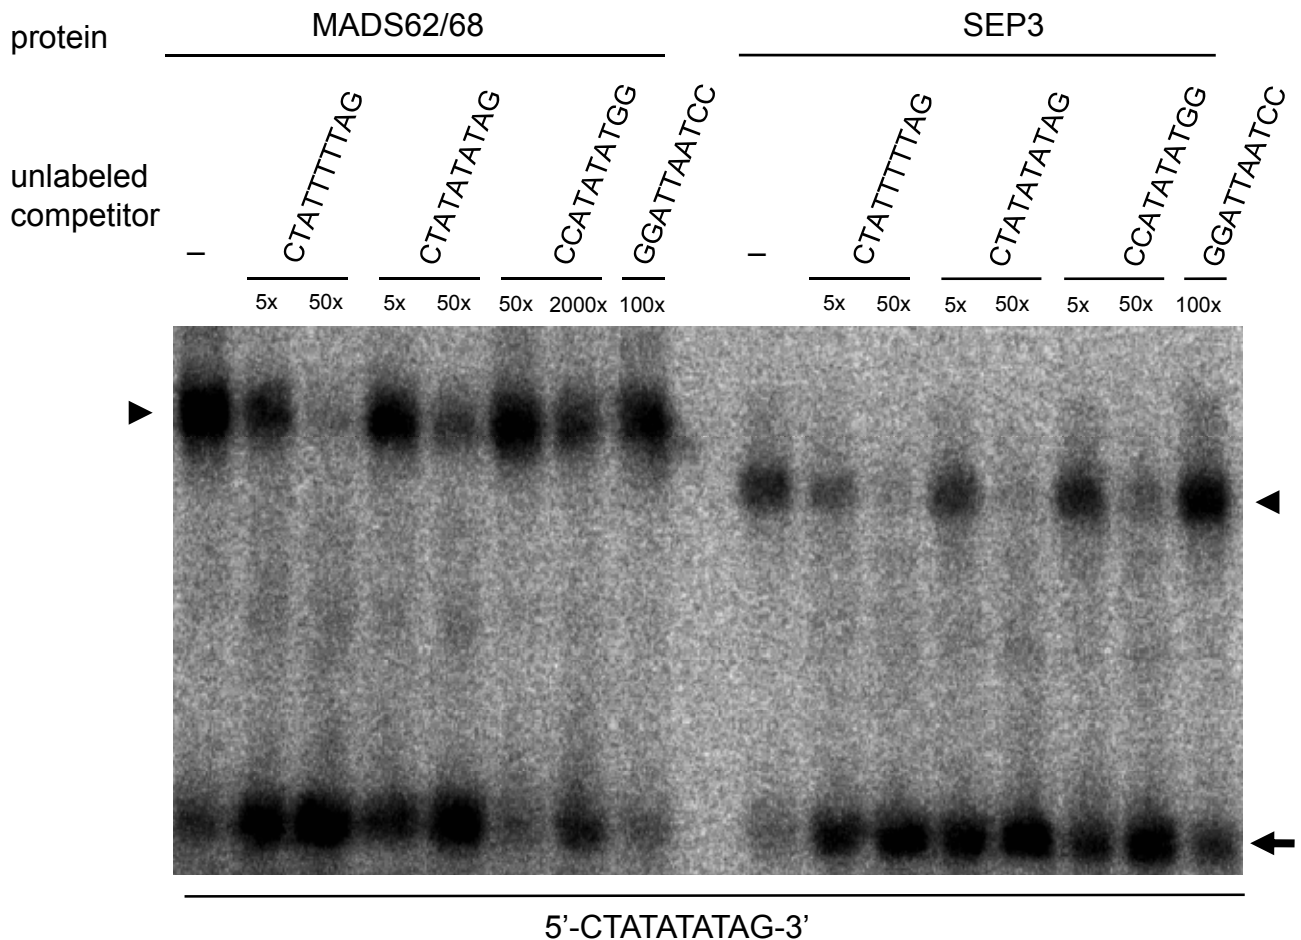

**Supplemental Figure 5. Competitive EMSA for MIKC\*-type heterodimers and SEP3.**

*In vitro* co-translated MADS62/MADS68 or SEP3 were incubated with a labeled containing a N10-type CTATATATAG probe (-), and the different competitor probes with the excess at which they were used in each lane. Free DNA is indicated by an arrow, shifted complexes by arrowheads.

Left panel: An unlabeled N10-type CTATTTT TAG probe successfully competes with a labeled N10-type CTATATATAG probe for binding to the MADS62/MADS68 protein complex (complete competition at 50-fold excess) and another unlabeled N10-type CTATATATAG probe compete to a lesser extent. In contrast, almost no competition was observed with an unlabeled probe containing the SRE-type motif CCATATATGG, even when a 2000-fold excess was supplied. Similarly, a 100-fold excess of an unlabeled probe containing the derived motif GGATTAATCC was not able to compete for binding.

Right panel: For N10-type competitor probes, SEP3 showed competition behavior similar to the MADS62/MADS68 heterodimer. But the binding of SEP3 to N10-type probe could be almost completely outcompeted with only 50-fold excess of the SRE-type competitor. An unlabeled probe containing the derived motif GGATTAATCC was used for a negative control.

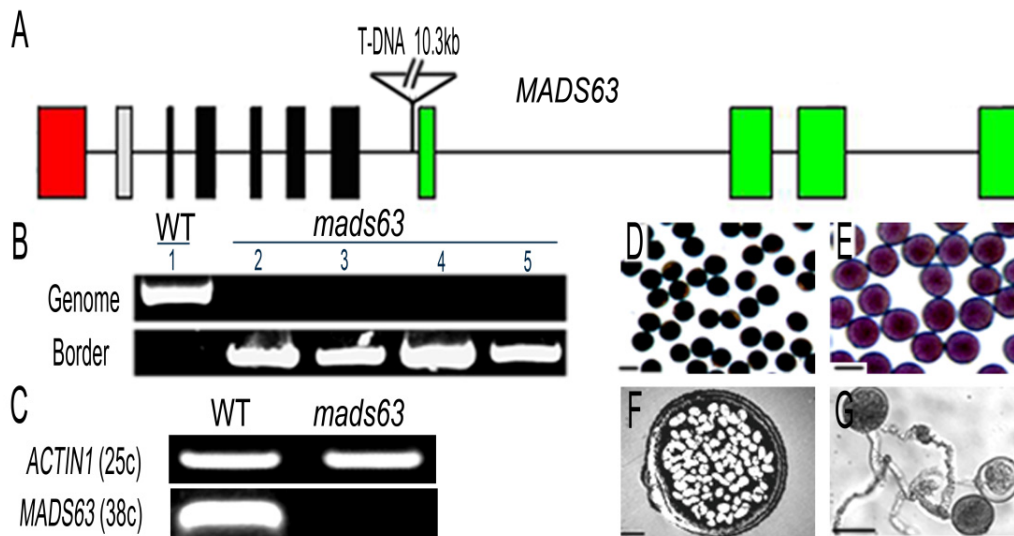

**Supplemental Figure 6. The identification and microscopic analyses of pollen of *MADS63* T-DNA insertion mutants.**

**(A)** Schematic diagram of the genomic structure of *MADS63* and T-DNA insertion position. Red box corresponds to exon encoding MADS-box domain, whereas grey box represents exon encoding I region; black boxes, K domain and light green boxes, C terminal, with lines indicating introns. The 10.3 kb T-DNA insertion disrupts the seventh intron of *MADS63* in the mutant line 2D-10691.

**(B)** The molecular identification of *mads63* T-DNA mutant. Four homozygous plants from F3 generation (lane 2-5) were determined by genomic PCR using T-DNA border primer combined with *MADS63* specific primer pairs (listed in Supplemental Table 3 online).

**(C)** RT-PCR analyses of *MADS63* transcript in homozygous mutant. Total RNA samples were prepared from anthers at stage 13 of wild-type and *mads63* homozygous mutant of F3 generation. The *ACTIN1* serves as standard control. The cycle number of PCR is shown in parentheses.

**(D) to (G)** The *mads63* pollen phenotypes investigated by I<sub>2</sub>-KI staining **(D)**, Alexander staining **(E)**, transmission electron microscopy **(F)** and the germination assays *in vitro* **(G)**. Scale bars = 50 μm in **(D)**, **(E)** and **(G)**, and 3 μm in **(F)**.

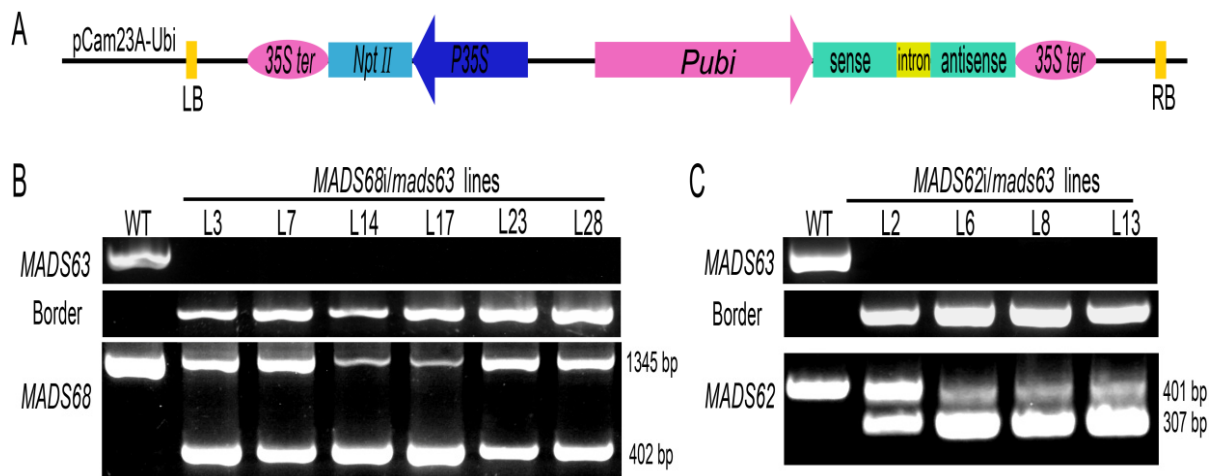

**Supplemental Figure 7. Schematic diagram of RNAi constructs and identification of *MADS68i/mads63* and *MADS62i/mads63* transgenic plants.**

**(A)** Schematic representation of the *MADS62* and *MADS68* RNAi constructs for transformation into *mads63* background rice. The dsRNAi cassette containing two oppositely orientated fragments and an intron was introduced into pCam23A-Ubi bone vector. *Pubi*, Maize *UBIQUITIN* promoter. *Npt II*, G418-resistant selectable marker gene. *35S ter*, CaMV35S terminator. *P35S*, CaMV35S promoter. LB, left border. RB, right border.

**(B)** The molecular identification of *MADS68i/mads63* transgenic lines. The homozygous status for *MADS63* allele in *MADS68i/mads63* plants were determined by genomic PCR using T-DNA border primer combined with *MADS63* specific primer pairs (see Methods). The *MADS68* RNAi positive lines were identified by genomic PCR using *MADS68* specific primer pairs (*MADS68-F* and *MADS68-R*, see Supplemental Table 3 online; the length of the foreign RNAi fragment and the corresponding endogenous genomic sequence is 402 and 1345 bp, respectively). Six selected lines L3, L7, L14, L17, L23 and L28 were showed.

**(C)** The molecular identification of *MADS62i/mads63* transgenic lines. The homozygous status for *MADS63* allele in *MADS62i/mads63* plants were determined by genomic PCR using T-DNA border primer combined with *MADS63* specific primer pairs. The *MADS62* RNAi positive lines were identified by genomic PCR using *MADS62* specific primer pairs (*MADS62-F* and *MADS62-R*, see Supplemental Table 3 online; the length of the foreign RNAi fragment and the corresponding endogenous genomic sequence is 307 and 401 bp, respectively). Four selected lines L2, L6, L8, and L13 were showed.



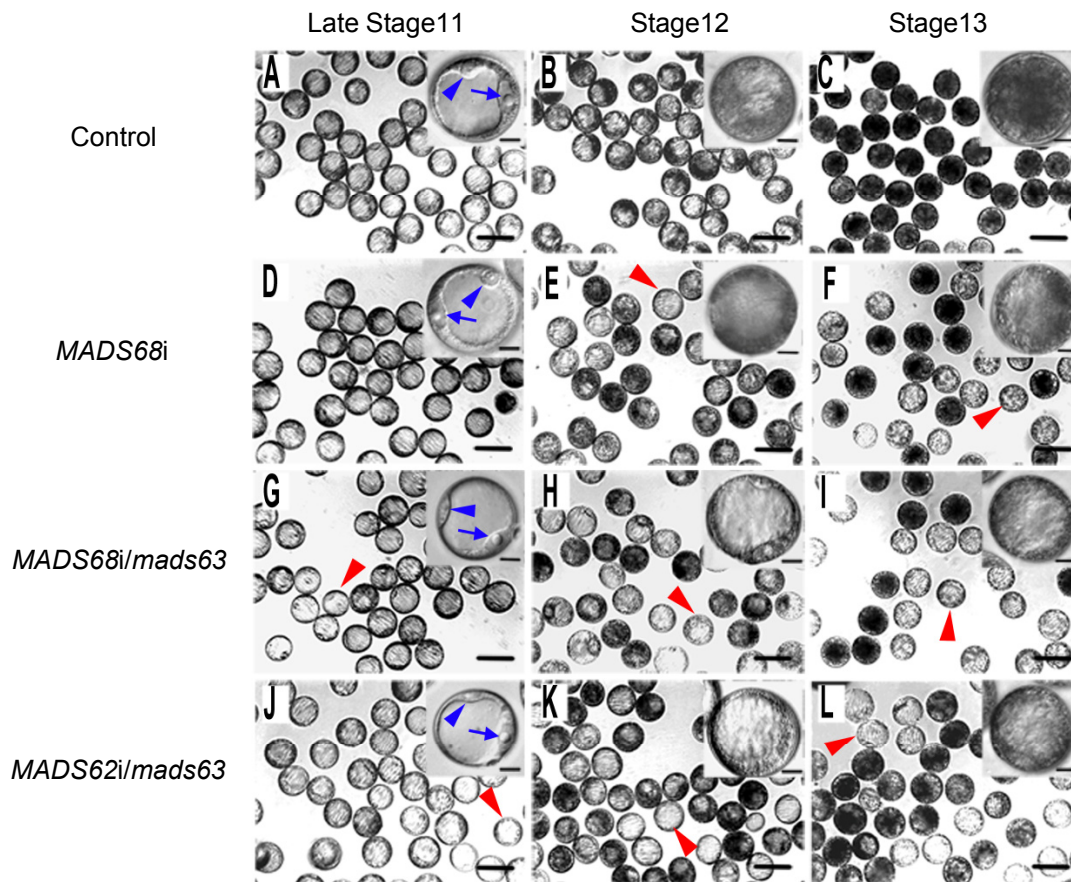

**Supplemental Figure 8. Delay and arrest of pollen development occurs from bicellular stage.**

(A) to (C) The development process of pollen from anther at late stage 11 to 13 of a control plant.

(D) to (F) The development process of pollen from anther at late stage 11 to 13 of line *MADS68* RNAi L7.

(G) to (I) The development process of pollen from anther at late stage 11 to 13 of line *MADS68i/mads63* L7.

(J) to (L) The development process of pollen from anther at late stage 11 to 13 of line *MADS62i/mads63* L13.

The pollen were collected and prepared from anthers at the late stage 11 ([A], [D], [G], and [J]), when starch granules started to accumulate in bicellular pollen of control plants; anthers at the stage 12 ([B], [E], [H], and [K]), when starch were filled in the most space of pollen in control plants; and anthers at the stage 13 ([C], [F], [I], and [L]), when pollen achieved maturation with three nuclei in control plants. Insets show magnified pollen with apparent defects at the corresponding panel. Red arrowheads indicate abnormal pollen from *MADS68* RNAi, *MADS68i/mads63*, and *MADS62i/mads63* lines. Blue arrows indicate the vegetative nucleus and arrowheads indicate generative cell in insets ([A], [D], [G], and [J]).

Scale bars = 100 μm in (A) to (L), and 12.5 μm in the corresponding insets.



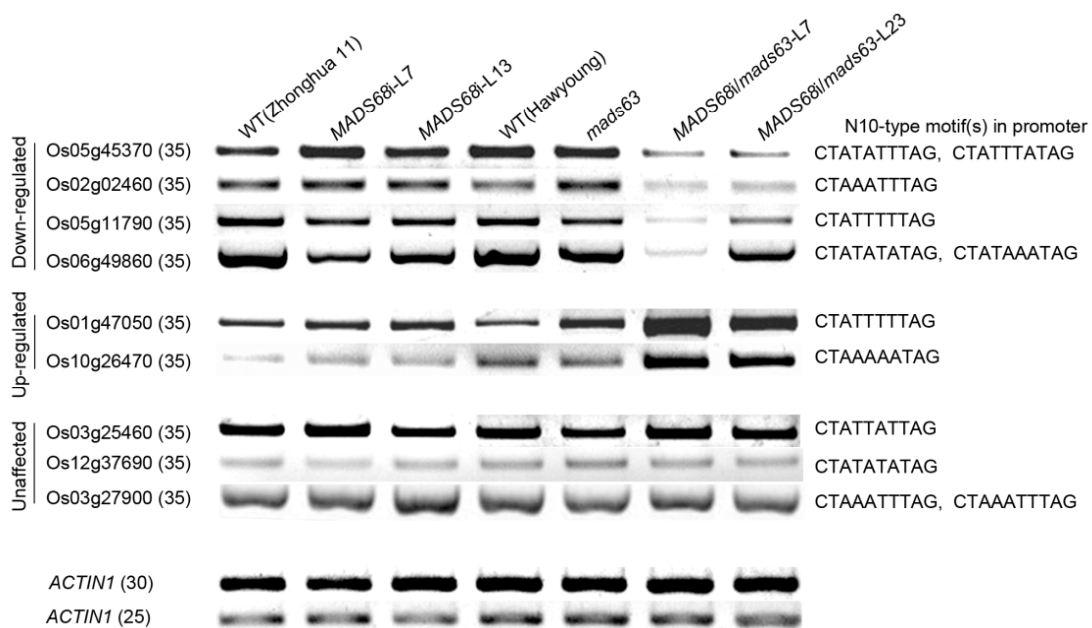

**Supplemental Figure 9. RT-PCR analyses for a selection of nine *in silico* predicted target genes of the rice MIKC\*-type protein complexes.**

Total RNAs were pooled from anthers at stage 13 of wild-type (Zhonghua 11 and Hwayoung), *mads63* mutant, *MADS68* RNAi, and *MADS68i/mads63* lines. *ACTIN1* is amplified as the standard control. For each of the putative target genes, N10-type motif(s) present in the promoter region are listed in right. The cycle number of PCR is shown in parentheses for each gene.

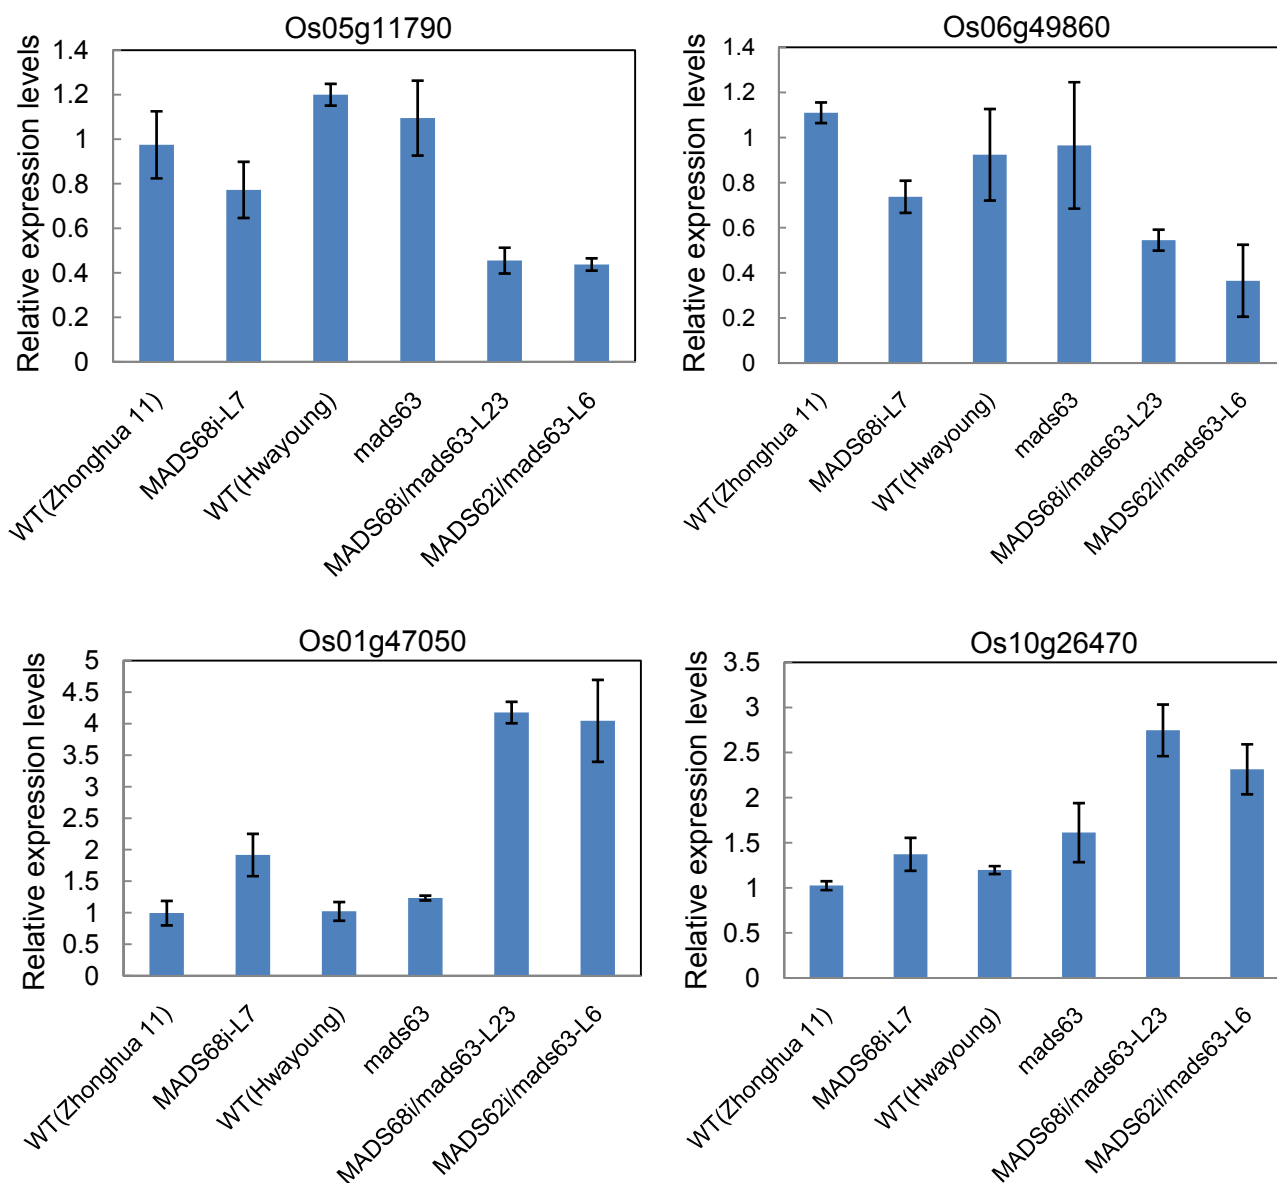

**Supplemental Figure 10. qRT-PCR analyses of the expressions of putative target genes of the rice MIKC\*-type protein complexes.**

Total RNAs were pooled from anthers at stage 13 of wild-type (Zhonghua 11 and Hwayoung), *mads63* mutant, *MADS68* RNAi, *MADS68i/mads63*, and *MADS62i/mads63* lines. The samples were quantified using *UBIQUITIN* as a reference gene and the data are presented as mean  $\pm$  SD (standard deviation,  $n = 3$ ).

**Supplemental Table 3.** Gene-specific primers used in this study.

| Gene name                                                  | Primer name         | Sequences (5' to 3')                                    | Enzyme                         |
|------------------------------------------------------------|---------------------|---------------------------------------------------------|--------------------------------|
| RNAi constructs (restriction sites are underlined)         |                     |                                                         |                                |
| <i>MADS62</i>                                              | <i>MADS62</i> -F    | CAGA <u>AAGCTT</u> <u>GAATTC</u> GCCGGAGGCCACGCCG       | <i>Hind</i> III/ <i>Eco</i> RI |
|                                                            | <i>MADS62</i> -R    | GAC <u>CTCGAG</u> <u>CCCGGG</u> TAGGTTAGTTAGGTGAGGT     | <i>Xho</i> I/ <i>Sma</i> I     |
| <i>MADS68</i>                                              | <i>MADS68</i> -F    | CAGA <u>AAGCTT</u> <u>GAATTC</u> TCACAGCAGCATAGAGGATGTC | <i>Hind</i> III/ <i>Eco</i> RI |
|                                                            | <i>MADS68</i> -R    | GAC <u>CTCGAG</u> <u>CCCGGG</u> AGTGGGAGCTTCATGTCGTTCT  | <i>Xho</i> I/ <i>Sma</i> I     |
| <i>mads63</i> mutant identification                        |                     |                                                         |                                |
|                                                            | Right border primer | ACCGTGGTAGTAAGAATGGA                                    |                                |
|                                                            | M63-F               | TTTGATCAACATGCTCACC                                     |                                |
|                                                            | M63-R               | CTGCATGGCAGATGTTGAC                                     |                                |
| Promoters amplification (restriction sites are underlined) |                     |                                                         |                                |
| <i>MADS62</i>                                              | P62-F               | CAG <u>CTGCAGC</u> GGAGTGATCAGTAGTTCTTG                 | <i>Pst</i> I                   |
|                                                            | P62-R               | GAC <u>CCCGGGC</u> CTTATCCCTCGCCGCCGA                   | <i>Sma</i> I                   |
| <i>MADS63</i>                                              | P63-F               | CAG <u>CTGCAGA</u> AAGGCCTTGCAGCTCACCATAC               | <i>Pst</i> I                   |
|                                                            | P63-R               | GAC <u>TCTAGAG</u> GGCCGCCGGCGATTCA                     | <i>Xba</i> I                   |
| <i>MADS68</i>                                              | P68-F               | CAG <u>TCTAGAG</u> GGAACCTCACCGGCTAGCCATC               | <i>Xba</i> I                   |
|                                                            | P68-R               | GAC <u>CCCGGGG</u> CGGAGGCAGAATCCCCTCT                  | <i>Sma</i> I                   |
| Y2H constructs (restriction sites are underlined)          |                     |                                                         |                                |
| <i>MADS62</i>                                              | Y62-F               | GGAATT <u>CCATATG</u> ATGGGGAGGGTGAAGCTGCC              | <i>Nde</i> I                   |
|                                                            | Y62-R               | CAGGAATT <u>CGGCG</u> ATGTTCCCGGGCGGCG                  | <i>Eco</i> RI                  |
| <i>MADS63</i>                                              | Y63-F               | GACGAATT <u>CATGGG</u> ACGGGTGAAGCTGCA                  | <i>Eco</i> RI                  |
|                                                            | Y63-R               | CAGGGAT <u>CCACCA</u> ACGTTAACCGGAGCAA                  | <i>Bam</i> HI                  |
| <i>MADS68</i>                                              | Y68-F               | GGAATT <u>CCATATG</u> ATGGGGAGGGTCAAGCTC                | <i>Nde</i> I                   |
|                                                            | Y68-R               | CAGGAATT <u>CAATCATG</u> AGCTGCCGGTGTG                  | <i>Eco</i> RI                  |
| BiFC constructs (restriction sites are underlined)         |                     |                                                         |                                |

|               |       |                                        |             |
|---------------|-------|----------------------------------------|-------------|
| <i>MADS62</i> | B62-F | GAC <u>ACTAGT</u> ATGGGGAGGGTGAAGCTGCC | <i>SpeI</i> |
|               | B62-R | CAGCTCGAGGGCGATGTTCCGCCGGCGG           | <i>XhoI</i> |
| <i>MADS63</i> | B63-F | GAC <u>ACTAGT</u> ATGGGACGGGTGAAGCTGCA | <i>SpeI</i> |
|               | B63-R | CAGCTCGAGACCAACGTTAACCGGAGCAAT         | <i>XhoI</i> |
| <i>MADS68</i> | B68-F | GAC <u>ACTAGT</u> ATGGGGAGGGTCAAGCTCAA | <i>SpeI</i> |
|               | B68-R | CAGCTCGAGCATGAGCTGCCGGTGTGGT           | <i>XhoI</i> |

---

*In situ* expression analyses

|               |         |                                            |
|---------------|---------|--------------------------------------------|
| <i>MADS62</i> | 62i-F   | GACGCAGATGTACGTGAGCC                       |
|               | 62i-R   | GTTGCTGTCGTACGCCATGA                       |
|               | T762i   | TAATACGACTCACTATAGGGGTTGCTGTCGTACGCCATGA   |
| <i>MADS63</i> | 63i-F   | TTGGAAGCGATGAGGTGGC                        |
|               | 63i-R   | GAGCAATGTCCTCAGCTGC                        |
|               | T763i   | TAATACGACTCACTATAGGGGAGCAATGTCCTCAGCTGC    |
| <i>MADS68</i> | 68i-F   | TCACAGCAGCATAGAGGATGTC                     |
|               | 68i-R   | AGTGGGAGCTTCATGTCGTTCT                     |
|               | T768i-F | TAATACGACTCACTATAGGGTCACAGCAGCATAGAGGATGTC |
|               | T768i-R | TAATACGACTCACTATAGGGAGTGGGAGCTTCATGTCGTTCT |

---

RT-PCR analyses

|                |        |                        |
|----------------|--------|------------------------|
| <i>MADS62</i>  | R62-F  | AGGGTGAAGCTGCCGATCA    |
|                | R62-R  | AGGTCAGGCGATGTTTCGC    |
| <i>MADS63</i>  | R63-F  | ACGGGTGAAGCTGCAGATC    |
|                | R63-R  | TCTAATTAACCAACGTTAACCG |
| <i>MADS68</i>  | R68-F  | GGAGGGTCAAGCTCAAGATA   |
|                | R68-R  | TCAAATCATGAGCTGCCGGT   |
| LOC_Os05g45370 | R05-F1 | TCGCTCATCGGCATCATCTT   |
|                | R05-R1 | TGCCAAACTTAATGGTCCTGTC |
| LOC_Os03g25460 | R03-F1 | TAACCTCAACAACCCTGCT    |
|                | R03-R1 | GTCTCGTCTCCTCCCATCC    |
| LOC_Os01g47050 | R01-F  | TCTTCTTGCGGATTAGTTTGT  |
|                | R01-R  | ACCTACCTCTTGCCATTGTTT  |

|                  |                  |                                                     |
|------------------|------------------|-----------------------------------------------------|
| LOC_Os05g11790   | R05-F3<br>R05-R3 | CCAAACCCTACAACCTCGCATCA<br>GCCCTTTCCTCCCTTCCTT      |
| LOC_Os03g27900   | R03-F2<br>R03-R2 | GGAGGCCAAGGAGAAGATGG<br>TGCTCGAACACCAGCACCT         |
| LOC_Os12g37690   | R12-F<br>R12-R   | TGCGATGCCAACAGTGCTA<br>CTCGGAAATGCCCTCAGAAAA        |
| LOC_Os02g02460   | R02-F<br>R02-R   | ATGTTTCGTCAGCCAGGTGC<br>AGGAGCCGAGGAAGAAAGG         |
| LOC_Os10g26470   | R10-F<br>R10-R   | GCGGCACGACGATGGAGAT<br>TCGACACCGACTGGATGGG          |
| LOC_Os06g49860   | R06-F<br>R06-R   | AGATGATCGGCAGCGTGTCC<br>GACCTCCAACGAGTGCTACGAG      |
| <i>ACTIN1</i>    | Act-F<br>Act-R   | CCAATCGTGAGAAGATGACCCA<br>CCATCAGGAAGCTCGTAGCTCT    |
| <hr/>            |                  |                                                     |
| qRT-PCR analyses |                  |                                                     |
| <i>MADS62</i>    | q62-F<br>q62-R   | AGGACCGCCTTAGGATGTTTCG<br>GACTCGGGTCAGCAATTCCAT     |
| <i>MADS63</i>    | q63-F<br>q63-R   | GTCGGTGGCGTCGATATTC<br>GCATCTTGTCTCATCGTGTCGT       |
| <i>MADS68</i>    | q68-F<br>q68-R   | CGGATTCATAAGGAGAACTTTGC<br>GAAGTGTTTCGGGTCACCTGTTAG |
| LOC_Os01g47050   | q01-F<br>q01-R   | AATCGTCGATCCCAGCACC<br>CAATCCCACCAACCAGAACC         |
| LOC_Os05g11790   | q05-F<br>q05-R   | CAATGGCGAGTTCAAGGTCC<br>GATGCGAGTTGTAGGGTTTGG       |
| LOC_Os06g49860   | q06-F<br>q06-R   | GCGAGTCATTCAGCACCTACC<br>CCTCACGATCCTGTCCACCT       |
| LOC_Os10g26470   | q10-F<br>q01-R   | TCCACCAATGACTGGCACAA<br>CCAAGAAGGCCGCTTTGAGA        |

|                                                                             |         |                                                  |                |
|-----------------------------------------------------------------------------|---------|--------------------------------------------------|----------------|
| <i>ACTIN1</i>                                                               | qAct-F  | TGCTATGTACGTCGCCATCCAG                           |                |
|                                                                             | qAct-R  | AATGAGTAACCACGCTCCGTCA                           |                |
| <i>UBIQUITIN</i>                                                            | qUbi-F  | CACCCTGGCTGACTACAACA                             |                |
|                                                                             | qUbi-R  | TTCTTCTTGCGGCAGTTGAC                             |                |
| <hr/>                                                                       |         |                                                  |                |
| EMSA assays (restriction sites are underlined)                              |         |                                                  |                |
| <i>MADS62</i>                                                               | E62-F   | ATCGAT <u>GAATTC</u> GCCGCCATGGGGAGGGTGAAGCTGC   | <i>EcoRI</i>   |
|                                                                             | E62-R   | ATCGAT <u>CTAGAT</u> CAGGCGATGTTCCGCCGC          | <i>XbaI</i>    |
| <i>MADS63</i>                                                               | E63-F   | ATCGAT <u>GAATTC</u> GCCGCCATGGGACGGGTGAAGCTGCAG | <i>EcoRI</i>   |
|                                                                             | E63-R   | ATCGAT <u>CTAGAT</u> TTAACCAACGTTAACCGGAGCAATG   | <i>XbaI</i>    |
| <hr/>                                                                       |         |                                                  |                |
| Protoplast transient transfection assays (restriction sites are underlined) |         |                                                  |                |
| <i>MADS62</i>                                                               | LUC62-F | ATGGGGAGGGTGAAGCTGC                              |                |
|                                                                             | LUC62-R | TCAGGCGATGTTCCGCCGC                              |                |
| <i>MADS63</i>                                                               | LUC63-F | ATGGGACGGGTGAAGCTGC                              |                |
|                                                                             | LUC63-R | TTAACCAACGTTAACCGGAGCA                           |                |
| <i>MADS68</i>                                                               | LUC68-F | ATGGGGAGGGTCAAGCTCAA                             |                |
|                                                                             | LUC68-R | TCAAATCATGAGCTGCCGGT                             |                |
| LOC_Os05g11790                                                              | LUC05-F | CAGA <u>AAGCTT</u> GTTCACTAATGATGCAACGGAA        | <i>HindIII</i> |
|                                                                             | LUC05-R | CTG <u>ACTAGT</u> CCGGATTAGTGTATGTTACAG          | <i>SpeI</i>    |
| LOC_Os06g49860                                                              | LUC06-F | CAGA <u>AAGCTT</u> CATCACCATCTTGTCTCATCAG        | <i>HindIII</i> |
|                                                                             | LUC06-R | GAC <u>GGATCC</u> TGATCGGACAAGGACGAGTA           | <i>BamHI</i>   |
| <hr/>                                                                       |         |                                                  |                |

**Supplemental Table 2.** Genetic analyses of the *mads63* mutant.

+/+ , +/- and -/- represents wild-type (WT), heterozygous and homozygous genotype, respectively.

| Self-cross        | the number of each genotype (percentage) |             |           |       |
|-------------------|------------------------------------------|-------------|-----------|-------|
|                   | +/+                                      | +/-         | -/-       | total |
| +/- (♀) × +/- (♂) | 15 (21 %)                                | 40 (55 %)   | 17 (24 %) | 72    |
| Test-cross        | the number of each genotype (percentage) |             |           |       |
|                   | +/+                                      | +/-         | -/-       | total |
| +/- (♀) × +/+ (♂) | 9 (42.9 %)                               | 12 (57.1 %) | 0         | 21    |
| back-cross        | the number of each genotype (percentage) |             |           |       |
|                   | +/+                                      | +/-         | -/-       | total |
| -/- (♀) × +/+ (♂) | 0                                        | 18 (100 %)  | 0         | 18    |



**Supplemental Table 1.** Detailed description of MIKC\*-type genes used for alignment and phylogenetic analyses.

| <b>Class</b>                                   | <b>Order</b>   | <b>Species</b>                    | <b>Gene name</b>            | <b>Accession number of mRNA / EST / PUT</b> |          |
|------------------------------------------------|----------------|-----------------------------------|-----------------------------|---------------------------------------------|----------|
| <b>bryophyte MIKC* sequences</b>               |                |                                   |                             |                                             |          |
| liverwort (the most ancient land plant family) | Marchantiales  | <i>Marchantia polymorpha</i>      | Mp <i>MADS1</i>             | GQ334454                                    |          |
|                                                | Sphagnales     | <i>Sphagnum subsecundum</i>       | Ss <i>MADS1</i>             | GQ334455                                    |          |
|                                                | Sphagnales     | <i>Sphagnum subsecundum</i>       | Ss <i>MADS2</i>             | GQ334456                                    |          |
|                                                | Sphagnales     | <i>Sphagnum subsecundum</i>       | Ss <i>MADS3</i>             | GQ334457                                    |          |
|                                                | Sphagnales     | <i>Sphagnum subsecundum</i>       | Ss <i>MADS4</i>             | GQ334458                                    |          |
|                                                | Funariales     | <i>Funaria hygrometrica</i>       | Fh <i>MADS1</i>             | GQ334460                                    |          |
|                                                | Funariales     | <i>Funaria hygrometrica</i>       | Fh <i>MADS2</i>             | GQ334461                                    |          |
|                                                | Funariales     | <i>Funaria hygrometrica</i>       | Fh <i>MADS3</i>             | GQ334462                                    |          |
|                                                | mosses         | Funariales                        | <i>Funaria hygrometrica</i> | Fh <i>MADS4</i>                             | GQ334463 |
|                                                |                | Funariales                        | <i>Funaria hygrometrica</i> | Fh <i>MADS5</i>                             | GQ334464 |
|                                                |                | Funariales                        | <i>Funaria hygrometrica</i> | Fh <i>MADS6</i>                             | GQ334465 |
| Funariales                                     |                | <i>Funaria hygrometrica</i>       | Fh <i>MADS7</i>             | GQ334466                                    |          |
| Funariales                                     |                | <i>Funaria hygrometrica</i>       | Fh <i>MADS8</i>             | GQ334467                                    |          |
| Funariales                                     |                | <i>Funaria hygrometrica</i>       | Fh <i>MADS9</i>             | GQ334468                                    |          |
| Funariales                                     |                | <i>Funaria hygrometrica</i>       | Fh <i>MADS10</i>            | GQ334469                                    |          |
| Funariales                                     |                | <i>Funaria hygrometrica</i>       | Fh <i>MADS11</i>            | GQ334470                                    |          |
| <b>lycophyte MIKC* sequences</b>               |                |                                   |                             |                                             |          |
| lycophyte                                      | Selaginellales | <i>Selaginella moellendorffii</i> | Sm <i>MADS4</i>             | FM999805                                    |          |
|                                                | Selaginellales | <i>Selaginella moellendorffii</i> | Sm <i>MADS10</i>            | FM999806                                    |          |
|                                                | Selaginellales | <i>Selaginella moellendorffii</i> | Sm <i>MADS2</i>             | FM999807                                    |          |
| <b>monilophyte MIKC* sequences</b>             |                |                                   |                             |                                             |          |

|                                   |              |                                 |                                |                                  |
|-----------------------------------|--------------|---------------------------------|--------------------------------|----------------------------------|
| fern                              | Polypodiales | <i>Ceratopteris richardii</i>   | Cr CRM13                       | FM995267                         |
|                                   | Polypodiales | <i>Ceratopteris richardii</i>   | Cr CRM14                       | FM995269                         |
|                                   | Polypodiales | <i>Ceratopteris richardii</i>   | Cr CRM15                       | FM995271                         |
|                                   | Polypodiales | <i>Ceratopteris richardii</i>   | Cr CRM16                       | FM995273                         |
| <b>seed plant MIKC* sequences</b> |              |                                 |                                |                                  |
| gymnosperm                        | Pinales      | <i>Picea glauca</i>             | Pigla MADS1                    | PUT-163a-Picea_glauca-52072      |
| basal eudicots                    | Ranunculales | <i>Eschscholzia californica</i> | Ec MADS1                       | FM958508                         |
|                                   | Ranunculales | <i>Eschscholzia californica</i> | Ec MADS2                       | FM958509                         |
|                                   | Ranunculales | <i>Aquilegia coerulea</i>       | Ac_v1.025702                   | scaffold_14:3,009,710..3,011,727 |
|                                   | Ranunculales | <i>Aquilegia coerulea</i>       | Ac_v1.007645                   | scaffold_2:5,042,310..5,047,097  |
| eudicots                          | Brassicales  | <i>Arabidopsis thaliana</i>     | At AGL30                       | NM_001084404                     |
|                                   | Brassicales  | <i>Arabidopsis thaliana</i>     | At AGL65                       | NM_101733                        |
|                                   | Brassicales  | <i>Arabidopsis thaliana</i>     | At AGL94                       | NM_105623                        |
|                                   | Brassicales  | <i>Arabidopsis thaliana</i>     | At AGL66                       | NM_106447                        |
|                                   | Brassicales  | <i>Arabidopsis thaliana</i>     | At AGL67                       | NM_106444                        |
|                                   | Brassicales  | <i>Arabidopsis thaliana</i>     | At AGL104                      | NM_102063                        |
|                                   | Malpighiales | <i>Populus trichocarpa</i>      | POPTR_0008s08780               | XM_002311272                     |
|                                   | Malpighiales | <i>Populus trichocarpa</i>      | POPTR_0002s09290               | XM_002300999                     |
|                                   | Malpighiales | <i>Populus trichocarpa</i>      | POPTR_0007s05980               | XM_002310547                     |
|                                   | Malpighiales | <i>Populus trichocarpa</i>      | POPTR_0010s17450               | XM_002316094                     |
|                                   | Vitales      | <i>Vitis vinifera</i>           | GSVIVG 01007989001             | XM_002281925                     |
|                                   | Vitales      | <i>Vitis vinifera</i>           | GSVIVG 01022182001             | XM_002276798                     |
|                                   | Graminales   | Graminales                      | <i>Brachypodium distachyon</i> | Bradi 3g39177                    |
| Graminales                        |              | <i>Zea mays</i>                 | GRMZM 2G152415                 | EU975181                         |
| Graminales                        |              | <i>Zea mays</i>                 | GRMZM 2G334225                 | BT066884                         |
| Graminales                        |              | <i>Sorghum bicolor</i>          | Sb 10g007810                   | XM_002436689                     |
| Graminales                        |              | <i>Brachypodium distachyon</i>  | Bradi 4g11097                  | XM_003577224                     |

|          |            |                         |                    |                                 |
|----------|------------|-------------------------|--------------------|---------------------------------|
| monocots | Graminales | <i>Sorghum bicolor</i>  | Sb 05g025970       | XM_002449891                    |
|          | Graminales | <i>Zea mays</i>         | GRMZM 2G441115     | Chr4:2,887,800-2,890,099        |
|          | Graminales | <i>Oryza sativa</i>     | Os MADS68          | FM956505                        |
|          | Graminales | <i>Oryza sativa</i>     | Os MADS62          | FM956504                        |
|          | Graminales | <i>Oryza sativa</i>     | Os MADS63          | FN663130                        |
|          | Graminales | <i>Hordeum vulgare</i>  | Hovul MADS1        | AK373111                        |
|          | Graminales | <i>Hordeum vulgare</i>  | Hovul MADS2        | AC239041 30785-32897            |
|          | Graminales | <i>Panicum virgatum</i> | Pavirv 00040498m.g | sg0.contig58690: 2292 - 4176    |
|          | Graminales | <i>Panicum virgatum</i> | Pavirv 00060579m.g | sg0.contig155006: 367 - 2175    |
|          | Graminales | <i>Panicum virgatum</i> | Pavirv 00018936m.g | sg0.contig49821: 1269 - 4636    |
|          | Graminales | <i>setaria italica</i>  | Si 013985m.g       | scaffold_6: 31708741 - 31711109 |
|          | Graminales | <i>setaria italica</i>  | Si 008439m.g       | scaffold_4: 7726121 - 7728329   |
|          | Graminales | <i>setaria italica</i>  | Si 028357m.g       | scaffold_8: 37418473 - 37421603 |

---

**Supplemental Table 4.** Sequences of EMSA probes used in this study. CArG-boxes are underlined.

| probe name                   | Sequences (5' to 3')                                                |
|------------------------------|---------------------------------------------------------------------|
| MEF2-1 probe                 | AATTCATCGATCGTTT <u>ACTATTTT</u> AG AAATATCGATCGG                   |
| MEF2-2 probe                 | AATTCATCGATCGTTT <u>ACTATATATAG</u> AAATATCGATCGG                   |
| SRF probe                    | AATTCATCGATCGTTT <u>ACCATATATGG</u> AAATATCGATCGG                   |
| competitive randomized probe | AATTCATCGATCGTTT <u>AGGATTAATCCA</u> AAATATCGATCGG                  |
| probe for LOC_Os10g26470     | TAATCATTGGCTGGATAAACCC <u>ACTAAAA</u> ATAGGGATGCTCCAATGAGATCATGCGG  |
| probe for LOC_Os05g11790     | GCTAAATTTGTATCGTCTTATAT <u>CCTATTTT</u> TAGGCAGTTCACAAATGGTGAAATTTA |
| probe for LOC_Os01g47050     | ATATACTGAGTAACACTAGTAAG <u>ACTATTTT</u> TAGAGAGAGAACGATTCAATGATTCAT |
| probe for LOC_Os06g49860     | TTTCAGTTCCTGCAACATTAGAT <u>CTATATATAG</u> TGAAACATTGTGAGTACACTATGC  |
